# Supplementary material
Source: Elsevier journal article supplement (https://www.sciencedirect.com/science/article/pii/S2255553618301885)
Supplement: mmc1 [file S2255553618301885:mmc1.docx]

JPED-2018-349 – Material Suplementar

**Appendix A**

Caregiver Reported Early Development Instruments (CREDI)

Formulário curto: Faixa etária 0-5 meses

Data: _____________________________

Identificação do Participante: ___________

Data de Nascimento: __________________

Idade da Criança (em meses): ___________

Instruções para o avaliador:

- Aplique o conjunto de itens que corresponde à faixa etária da criança.
- Lembre-se de mostrar aos cuidadores a ilustração na página completa correspondente, para os itens que incluem uma imagem.
- Antes de iniciar as perguntas, diga aos cuidadores:

**Agora, as próximas perguntas são sobre as coisas que seu filho faz atualmente. Por favor, responda "sim" ou "não" para essas questões. Se você tiver dúvidas, você também pode responder “não sei”. Lembre-se que as crianças aprendem e crescem em ritmos diferentes, por isso não se preocupe se o seu filho ainda não faz essas coisas. Algumas destas habilidades as crianças apenas irão realizar quando estiverem mais velhas. Se você tiver alguma dúvida ou sentir-se desconfortável, avise-me e podemos passar para a próxima pergunta.**

| Item | Item | Imagem | Resposta | | |
| --- | --- | --- | --- | --- | --- |
| A1 | A criança sorri quando as pessoas sorriem para ela? |  | Sim | Não | NS |
| A2 | A criança aperta um objeto pequeno quando é colocado em sua mão (ex: seu dedo, uma colher)? | 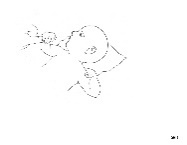 | Sim | Não | NS |
| A3 | A criança reconhece você ou outros membros da família (ex: sorrindo quando eles entram em um lugar ou movendo-se em direção a eles)? |  | Sim | Não | NS |
| A4 | A criança mostra interesse por novos objetos tentando colocá-los na boca? |  | Sim | Não | NS |
| A5 | Quando a criança está de bruços, ela consegue manter a cabeça e o peito levantados, utilizando apenas suas mãos e braços como suporte? | 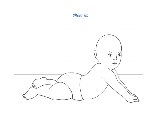 | Sim | Não | NS |
| A6 | A criança consegue pegar um objeto pequeno utilizando apenas uma mão (ex: um brinquedo pequeno ou pedra pequena)? | 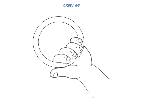 | Sim | Não | NS |
| A7 | Quando a criança está deitada de barriga para cima ela pega o pé dela? | 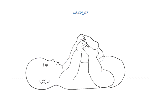 | Sim | Não | NS |
| A8 | A criança olha para um objeto quando alguém diz “olha!” e aponta para ele? |  | Sim | Não | NS |
| A9 | A criança olha para um objeto de interesse quando ele é removido de sua visão ou escondido dela (ex: colocado sob uma capa, atrás de outro objeto)? |  | Sim | Não | NS |
| A10 | A criança se movimenta ou muda de posição intencionalmente para pegar objetos que estão fora de seu alcance? |  | Sim | Não | NS |
| A11 | A criança brinca batendo um objeto no chão ou na mesa? |  | Sim | Não | NS |
| A12 | A criança consegue manter-se na posição sentada sem ajuda ou suporte por mais de alguns segundos? | **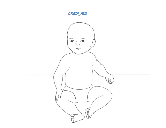** | Sim | Não | NS |
| A13 | A criança consegue pegar e comer pequenos pedaços de comida com os seus dedos? | **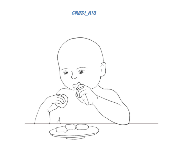** | Sim | Não | NS |
| A14 | A criança consegue transferir um objeto pequeno de uma mão para outra (ex: brinquedo pequeno ou pedra pequena)? | **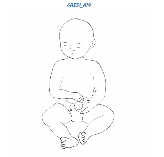** | Sim | Não | NS |
| A15 | A criança consegue utilizar gestos para indicar o que ela quer (ex: coloca os braços para cima quando ela quer colo ou aponta para água)? |  | Sim | Não | NS |
| A16 | A criança consegue engatinhar, rolar ou se rastejar para frente sozinha? | **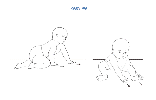** | Sim | Não | NS |
| A17 | A criança consegue jogar com a mão uma bolinha ou uma pedra pequena para frente? | **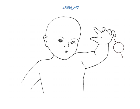** | Sim | Não | NS |
| A18 | A criança consegue pegar e jogar um objeto pequeno (ex: um brinquedo pequeno ou pedra pequena) dentro de um balde ou bacia, enquanto está sentada? | *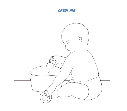* | Sim | Não | NS |
| A19 | A criança consegue dizer uma ou mais palavras (ex: Nomes como “mama” ou “bo” para bola )? |  | Sim | Não | NS |
| A20 | A criança consegue andar alguns passos enquanto segura em uma pessoa ou objeto (ex: parede ou móveis)? | **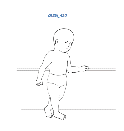** | Sim | Não | NS |

Caregiver Reported Early Development InstrumentS (CREDI)

Formulário curto: Faixa etária 6-11 MESES

Data: _____________________________

Identificação do Participante: ___________

Data de Nascimento: __________________

Idade da Criança (em meses): ___________

Instruções para o avaliador:

- Aplique o conjunto de itens que corresponde à faixa etária da criança.
- Lembre-se de mostrar aos cuidadores a ilustração na página completa correspondente, para os itens que incluem uma imagem.
- Antes de iniciar as perguntas diga aos cuidadores:

**Agora, as próximas perguntas são sobre as coisas que seu filho faz atualmente. Por favor, responda "sim" ou "não" para essas questões. Se você tiver dúvidas, você também pode responder “não sei”. Lembre-se que as crianças aprendem e crescem em ritmos diferentes, por isso não se preocupe se o seu filho ainda não faz essas coisas. Algumas destas habilidades as crianças apenas irão realizar quando estiverem mais velhas. Se você tiver alguma dúvida ou sentir-se desconfortável, avise-me e podemos passar para a próxima pergunta.**

| Item # | Item | Imagem | Resposta | | |
| --- | --- | --- | --- | --- | --- |
| B1 | A criança consegue pegar um objeto pequeno utilizando apenas uma mão (ex: um brinquedo pequeno ou pedra pequena)? | 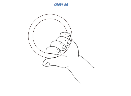 | Sim | Não | NS |
| B2 | A criança brinca batendo um objeto no chão ou na mesa? |  | Sim | Não | NS |
| B3 | A criança se movimenta ou muda de posição intencionalmente para pegar objetos que estão fora de seu alcance? |  | Sim | Não | NS |
| B4 | A criança olha para um objeto de interesse quando ele é removido de sua visão ou escondido dela (ex: colocado sob uma capa, atrás de outro objeto)? |  | Sim | Não | NS |
| B5 | A criança consegue manter-se na posição sentada sem ajuda ou suporte por mais de alguns segundos? | 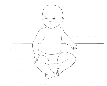 | Sim | Não | NS |
| B6 | A criança olha para um objeto quando alguém diz "olha!" e aponta para ele? |  | Sim | Não | NS |
| B7 | A criança consegue pegar e comer pequenos pedaços de comida com os seus dedos? | 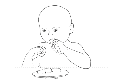 | Sim | Não | NS |
| B8 | A criança consegue engatinhar, rolar ou se rastejar para frente sozinha? | *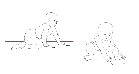* | Sim | Não | NS |
| B9 | A criança consegue transferir um objeto pequeno de uma mão para outra (ex: brinquedo pequeno ou pedra pequena)? | *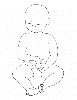* | Sim | Não | NS |
| B10 | A criança consegue utilizar gestos para indicar o que ela quer (ex: coloca os braços para cima quando ela quer colo ou aponta para água)? |  | Sim | Não | NS |
| B11 | A criança consegue pegar e jogar um objeto pequeno (ex: um brinquedo pequeno ou pedra pequena) dentro de um balde ou bacia, enquanto está sentada? | 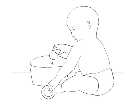 | Sim | Não | NS |
| B12 | A criança consegue jogar com a mão uma bolinha ou uma pedra pequena para frente? | **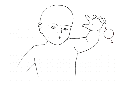** | Sim | Não | NS |
| B13 | A criança consegue dizer uma ou mais palavras (ex: nomes como "mama" ou "bo" para bola )? |  | Sim | Não | NS |
| B14 | A criança pede sua ajuda usando sinais ou palavras quando ela não consegue fazer alguma coisa sozinha (ex: pegar um objeto que está alto)? |  | Sim | Não | NS |
| B15 | A criança consegue andar alguns passos enquanto segura em uma pessoa ou objeto (ex: parede ou móveis)? | 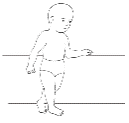 | Sim | Não | NS |
| B16 | A criança consegue seguir simples direções (ex: "levante-se" ou "venha aqui")? |  | Sim | Não | NS |
| B17 | A criança consegue ficar em pé, sem segurar ou receber apoio? | **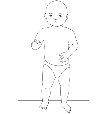** | Sim | Não | NS |
| B18 | A criança consegue apontar para uma pessoa ou objeto quando perguntam para ela (ex: "Onde está a mamãe" ou "Onde está a bola")? |  | Sim | Não | NS |
| B19 | A criança consegue subir em objetos como cadeira ou banco? | **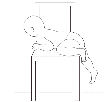** | Sim | Não | NS |
| B20 | A criança consegue chutar uma bola ou objeto redondo? | **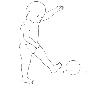** | Sim | Não | NS |

Caregiver Reported Early Development InstrumentS (CREDI)

Formulário curto: Faixa etária 12-17 MESES

Data: _____________________________

Identificação do Participante: ___________

Data de Nascimento: __________________

Idade da Criança (em meses): ___________

Instruções para o avaliador:

- Aplique o conjunto de itens que corresponde à faixa etária da criança.
- Lembre-se de mostrar aos cuidadores a ilustração na página completa correspondente, para os itens que incluem uma imagem.
- Antes de iniciar as perguntas diga aos cuidadores:

**Agora, as próximas perguntas são sobre as coisas que seu filho faz atualmente. Por favor, responda "sim" ou "não" para essas questões. Se você tiver dúvidas, você também pode responder “não sei”. Lembre-se que as crianças aprendem e crescem em ritmos diferentes, por isso não se preocupe se o seu filho ainda não faz essas coisas. Algumas destas habilidades as crianças apenas irão realizar quando estiverem mais velhas. Se você tiver alguma dúvida ou sentir-se desconfortável, avise-me e podemos passar para a próxima pergunta.**

| Item # | Item | Imagem | Resposta | | |
| --- | --- | --- | --- | --- | --- |
| C1 | A criança consegue ficar em pé, sem segurar ou receber apoio? | 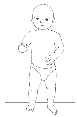 | Sim | Não | NS |
| C2 | A criança consegue seguir simples direções (ex: “levante-se” ou “venha aqui”)? |  | Sim | Não | NS |
| C3 | A criança imita o comportamento de outras pessoas (ex: lavar as mãos ou louças)? |  | Sim | Não | NS |
| C4 | A criança consegue subir em objetos como cadeira ou banco? | **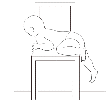** | Sim | Não | NS |
| C5 | A criança é gentil com crianças mais novas (ex: conversa com elas gentilmente, toca nas crianças suavemente)? |  | Sim | Não | NS |
| C6 | A criança demonstra curiosidade para aprender coisas novas (ex: fazendo perguntas ou explorando uma nova área)? |  | Sim | Não | NS |
| C7 | A criança consegue apontar para uma pessoa ou objeto quando perguntam para ela (ex: "Onde está a mamãe" ou "Onde está a bola")? |  | Sim | Não | NS |
| C8 | A criança consegue chutar uma bola ou objeto redondo? | **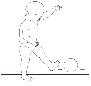** | Sim | Não | NS |
| C9 | A criança inclui outras pessoas nas brincadeiras (ex: brinca com jogos interativos com outras crianças)? |  | Sim | Não | NS |
| C10 | A criança demonstra solidariedade ou sentimento quando outras pessoas estão tristes ou machucadas? |  | Sim | Não | NS |
| C11 | A criança consegue correr alguns passos sem cair ou esbarrar em objetos? | **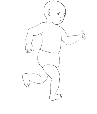** | Sim | Não | NS |
| C12 | A criança consegue beber em um copo sem tampa sozinha, sem derramar? | **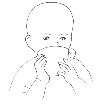** | Sim | Não | NS |
| C13 | A criança consegue empilhar três ou mais objetos (ex: blocos, copos, tampas de garrafas)? | **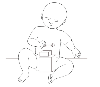** | Sim | Não | NS |
| C14 | A criança consegue responder perguntas (ex: “Você quer água?”) dizendo “sim” ou “não”, em vez de gesticular ou balançar a cabeça? |  | Sim | Não | NS |
| C15 | A criança brinca utilizando objetos como se eles fossem outras coisas (ex: imaginar que uma garrafa é uma boneca, uma pedra é um carro, ou uma colher é um avião)? |  | Sim | Não | NS |
| C16 | A criança consegue nomear corretamente pelo menos um membro da família que não seja a mãe e o pai (ex: nome do irmão, irmã, tia, tio)? |  | Sim | Não | NS |
| C17 | Quando a criança quer algo, ela consegue pedir pelo nome (ex: comida, água)? |  | Sim | Não | NS |
| C18 | A criança consegue andar de costas? | *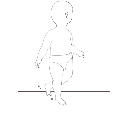* | Sim | Não | NS |
| C19 | Se você apontar para um objeto (ex: copo ou animal), a criança sabe nomeá-los corretamente? |  | Sim | Não | NS |
| C20 | A criança consegue falar mais de 10 palavras separadas (ex: nomes como “mama” ou objetos como “bola”)? |  | Sim | Não | NS |

Caregiver Reported Early Development InstrumentS (CREDI)

Formulário curto: Faixa etária 18-23 Meses

Data: _____________________________

Identificação do Participante: ___________

Data de Nascimento: __________________

Idade da Criança (em meses): ___________

Instruções para o avaliador:

- Aplique o conjunto de itens que corresponde à faixa etária da criança.
- Lembre-se de mostrar aos cuidadores a ilustração na página completa correspondente, para os itens que incluem uma imagem.
- Antes de iniciar as perguntas diga aos cuidadores:

**Agora, as próximas perguntas são sobre as coisas que seu filho faz atualmente. Por favor, responda "sim" ou "não" para essas questões. Se você tiver dúvidas, você também pode responder “não sei”. Lembre-se que as crianças aprendem e crescem em ritmos diferentes, por isso não se preocupe se o seu filho ainda não faz essas coisas. Algumas destas habilidades as crianças apenas irão realizar quando estiverem mais velhas. Se você tiver alguma dúvida ou sentir-se desconfortável, avise-me e podemos passar para a próxima pergunta.**

| Item # | Item | Imagem | Resposta | | |
| --- | --- | --- | --- | --- | --- |
| D1 | A criança consegue andar de costas? | *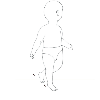* | Sim | Não | NS |
| D2 | Quando a criança quer algo ela consegue pedir pelo nome (ex: comida, água)? |  | Sim | Não | NS |
| D3 | A criança consegue nomear corretamente pelo menos um membro da família que não seja a mãe e o pai (ex: nome do irmão, irmã, tia, tio)? |  | Sim | Não | NS |
| D4 | Se você apontar para um objeto (ex: copo ou animal), a criança sabe nomeá-los corretamente? |  | Sim | Não | NS |
| D5 | A criança consegue tirar uma peça de roupa (ex: tirar sua blusa)? | 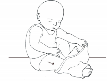 | Sim | Não | NS |
| D6 | A criança consegue falar mais de 10 palavras separadas (ex: nomes como “mama” ou objetos como “bola”)? |  | Sim | Não | NS |
| D7 | A criança consegue dizer a você quando ela está cansada ou com fome? |  | Sim | Não | NS |
| D8 | A criança consegue cantar uma música curta ou repetir frases com rimas (ex: poema) sozinha? |  | Sim | Não | NS |
| D9 | A criança consegue pular com os dois pés deixando o chão? | 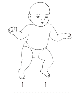 | Sim | Não | NS |
| D10 | A criança usa corretamente alguma das palavras “eu”, “você” “ele” ou “ela” (ex: “Eu vou na loja”, ou “Ele come arroz”)? |  | Sim | Não | NS |
| D11 | A criança consegue fazer perguntas corretamente utilizando alguma das palavras "O que" "Quem" "Onde" "Quando"? |  | Sim | Não | NS |
| D12 | A criança consegue contar até cinco objetos (ex: dedos, pessoas)? |  | Sim | Não | NS |
| D13 | A criança consegue falar utilizando sentenças/frases de 3 ou 4 palavras juntas (ex: "Eu quero água" ou "A casa é grande")? |  | Sim | Não | NS |
| D14 | Se você mostrar à criança dois objetos ou pessoas de diferentes tamanhos, ela consegue dizer qual é o objeto pequeno e qual é o grande? |  | Sim | Não | NS |
| D15 | A criança consegue identificar pelo menos uma cor (ex: vermelho, azul, amarelo)? |  | Sim | Não | NS |
| D16 | A criança consegue explicar com palavras para que servem objetos comuns como copo e cadeira? |  | Sim | Não | NS |
| D17 | Se você pedir para a criança te dar três objetos (ex: pedra, feijões), a criança entrega para você a quantidade correta? |  | Sim | Não | NS |
| D18 | Se você apontar para um objeto, a criança consegue usar corretamente as palavras “em cima”, “dentro” ou “embaixo” para descrever onde ele está (ex: “O copo está em cima da mesa” em vez de “O copo está dentro da mesa”)? |  | Sim | Não | NS |
| D19 | A criança pergunta por pessoas familiares que não sejam os pais, quando eles não estão presentes (ex: “Onde está o vizinho?”) ? |  | Sim | Não | NS |
| D20 | A criança faz perguntas “porquês” (ex: "Por que você é alto?") ? |  | Sim | Não | NS |

Caregiver Reported Early Development InstrumentS (CREDI)

Formulário curto: Faixa etária 24-29 MESES

Data: _____________________________

Identificação do Participante: ___________

Data de Nascimento: __________________

Idade da Criança (em meses): ___________

Instruções para o avaliador:

- Aplique o conjunto de itens que corresponde à faixa etária da criança.
- Lembre-se de mostrar aos cuidadores a ilustração na página completa correspondente, para os itens que incluem uma imagem.
- Antes de iniciar as perguntas diga aos cuidadores:

**Agora, as próximas perguntas são sobre as coisas que seu filho faz atualmente. Por favor, responda "sim" ou "não" para essas questões. Se você tiver dúvidas, você também pode responder “não sei”. Lembre-se que as crianças aprendem e crescem em ritmos diferentes, por isso não se preocupe se o seu filho ainda não faz essas coisas. Algumas destas habilidades as crianças apenas irão realizar quando estiverem mais velhas. Se você tiver alguma dúvida ou sentir-se desconfortável, avise-me e podemos passar para a próxima pergunta.**

| Item # | Item | Imagem | Resposta | | |
| --- | --- | --- | --- | --- | --- |
| E1 | Se você apontar para um objeto (ex: copo ou animal), a criança sabe nomeá-los corretamente? |  | Sim | Não | NS |
| E2 | A criança consegue falar mais de 10 palavras separadas (ex: nomes como “mama” ou objetos como “bola”)? |  | Sim | Não | NS |
| E3 | A criança consegue cantar uma música curta (musiquinha) ou repetir frases com rimas (ex: poema) sozinha? |  | Sim | Não | NS |
| E4 | A criança consegue pular com os dois pés deixando o chão? | 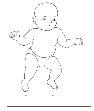 | Sim | Não | NS |
| E5 | A criança consegue falar utilizando sentenças/frases de 3 ou 4 palavras juntas (ex: “Eu quero água” ou “A casa é grande”)? |  | Sim | Não | NS |
| E6 | A criança consegue fazer perguntas corretamente utilizando alguma das palavras “O que” “Quem” “Onde” “Quando”? |  | Sim | Não | NS |
| E7 | A criança usa corretamente alguma das palavras “eu”, “você”, “ele” ou “ela” (ex: “Eu vou na loja” ou “Ele come arroz”)? |  | Sim | Não | NS |
| E8 | A criança pergunta por pessoas familiares que não sejam os pais, quando eles não estão presentes (ex: “Onde está o vizinho?”)? |  | Sim | Não | NS |
| E9 | A criança consegue contar até cinco objetos (ex: dedos, pessoas)? |  | Sim | Não | NS |
| E10 | A criança consegue identificar pelo menos uma cor (ex: vermelho, azul, amarelo)? |  | Sim | Não | NS |
| E11 | A criança com frequência chuta, morde ou bate em outras crianças ou adultos? |  | Sim | Não | NS |
| E12 | Se você mostrar à criança dois objetos ou pessoas de diferentes tamanhos, ela consegue dizer qual é o objeto pequeno e qual é o grande? |  | Sim | Não | NS |
| E13 | A criança fica isolada/reservada ou envergonhada em situações novas? |  | Sim | Não | NS |
| E14 | Se você apontar para um objeto, a criança consegue usar corretamente as palavras “em cima”, “dentro” ou “embaixo” para descrever onde ele está (ex: “O copo está em cima da mesa” em vez de “O copo está dentro da mesa”)? |  | Sim | Não | NS |
| E15 | A criança faz perguntas "porquês" (ex: "Por que você é alto?")? |  | Sim | Não | NS |
| E16 | Se você pedir para a criança te dar três objetos (ex: pedra, feijões), a criança entrega para você a quantidade correta? |  | Sim | Não | NS |
| E17 | A criança consegue explicar com palavras para que servem objetos comuns como copo e cadeira? |  | Sim | Não | NS |
| E18 | A criança consegue vestir roupas ou algumas peças do vestuário sozinha (ex: vestir as calças ou colocar a blusa sem ajuda)? | 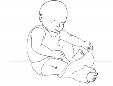 | Sim | Não | NS |
| E19 | A criança sabe dizer o que os outros gostam e não gostam (ex: “Mamãe não gosta de frutas” “Papai gosta de futebol”)? |  | Sim | Não | NS |
| E20 | A criança consegue falar sobre coisas que aconteceram no passado utilizando a linguagem correta (ex: “Ontem eu brinquei com os meus amigos” ou “Na semana passada ela foi no supermercado”)? |  | Sim | Não | NS |

Caregiver Reported Early Development InstrumentS (CREDI)

Formulário curto: Faixa etária 30-35 MESES

Data: _____________________________

Identificação do Participante: ___________

Data de Nascimento: __________________

Idade da Criança (em meses): ___________

Instruções para o avaliador:

- Aplique o conjunto de itens que corresponde à faixa etária da criança.
- Lembre-se de mostrar aos cuidadores a ilustração na página completa correspondente, para os itens que incluem uma imagem.
- Antes de iniciar as perguntas diga aos cuidadores:

**Agora, as próximas perguntas são sobre as coisas que seu filho faz atualmente. Por favor, responda "sim" ou "não" para essas questões. Se você tiver dúvidas, você também pode responder “não sei”. Lembre-se que as crianças aprendem e crescem em ritmos diferentes, por isso não se preocupe se o seu filho ainda não faz essas coisas. Algumas destas habilidades as crianças apenas irão realizar quando estiverem mais velhas. Se você tiver alguma dúvida ou sentir-se desconfortável, avise-me e podemos passar para a próxima pergunta.**

| Item # | Item | Imagem | Resposta | | |
| --- | --- | --- | --- | --- | --- |
| F1 | A criança consegue falar mais de 10 palavras separadas (ex: nomes como “mama” ou objetos como “bola”)? |  | Sim | Não | NS |
| F2 | A criança consegue pular com os dois pés deixando o chão? | 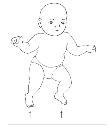 | Sim | Não | NS |
| F3 | A criança consegue falar utilizando sentenças/frases de 3 ou 4 palavras juntas (ex: “Eu quero água” ou “A casa é grande”)? |  | Sim | Não | NS |
| F4 | A criança consegue cantar uma música curta (musiquinhas) ou repetir frases com rimas (ex: poema) sozinha? |  | Sim | Não | NS |
| F5 | A criança consegue fazer perguntas corretamente utilizando alguma das palavras “O que” “Quem” “Onde” “Quando”? |  | Sim | Não | NS |
| F6 | A criança pergunta por pessoas familiares, que não sejam os pais, quando eles não estão presentes (ex: “Onde está o vizinho?”)? |  | Sim | Não | NS |
| F7 | A criança usa corretamente alguma das palavras “eu”, “você” “ele” ou “ela” (ex: “Eu vou na loja”, ou “Ele come arroz?”)? |  | Sim | Não | NS |
| F8 | A criança consegue contar até cinco objetos (ex: dedos, pessoas)? |  | Sim | Não | NS |
| F9 | A criança consegue identificar pelo menos uma cor (ex: vermelho, azul ou amarelo)? |  | Sim | Não | NS |
| F10 | Se você mostrar à criança dois objetos ou pessoas de diferentes tamanhos, ela consegue dizer qual é o objeto pequeno e qual é o grande? |  | Sim | Não | NS |
| F11 | Se você apontar para um objeto, a criança consegue usar corretamente as palavras “em cima”, “dentro” ou “embaixo” para descrever onde ele está (ex: O copo está em cima da mesa” em vez de “O copo está dentro da mesa”)? |  | Sim | Não | NS |
| F12 | A criança consegue explicar com palavras para que servem objetos comuns como copo e cadeira? |  | Sim | Não | NS |
| F13 | A criança consegue vestir roupas ou algumas peças do vestuário sozinha (ex: vestir as calças ou colocar a blusa sem ajuda)? | 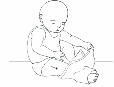 | Sim | Não | NS |
| F14 | A criança faz perguntas “porquês”? (ex: “Por que você é alto?”) |  | Sim | Não | NS |
| F15 | Se você pedir para a criança te dar três objetos (ex: pedra, feijões), a criança entrega para você a quantidade correta? |  | Sim | Não | NS |
| F16 | A criança com frequência chuta, morde ou bate em outras crianças ou adultos? |  | Sim | Não | NS |
| F17 | A criança fica isolada/reservada ou envergonhada em situações novas? |  | Sim | Não | NS |
| F18 | A criança age impulsivamente ou sem pensar com frequência (ex: corre para a rua sem olhar)? |  | Sim | Não | NS |
| F19 | A criança sabe dizer o que os outros gostam e não gostam (ex: “Mamãe não gosta de frutas” “Papai gosta de futebol”)? |  | Sim | Não | NS |
| F20 | A criança consegue falar sobre coisas que aconteceram no passado utilizando a linguagem correta (ex: “Ontem eu brinquei com os meus amigos” ou “Na semana passada ela foi no supermercado”)? |  | Sim | Não | NS |
